# Supplementary material for: Bioinformatics Modelling and Metabolic Engineering of the Branched Chain Amino Acid Pathway for Specific Production of Mycosubtilin Isoforms in Bacillus subtilis
Source: MDPI journal article supplement (doi:10.3390/metabo12020107), 2022-01-24
Supplement: s1 [file s1]

## Supplementary Data

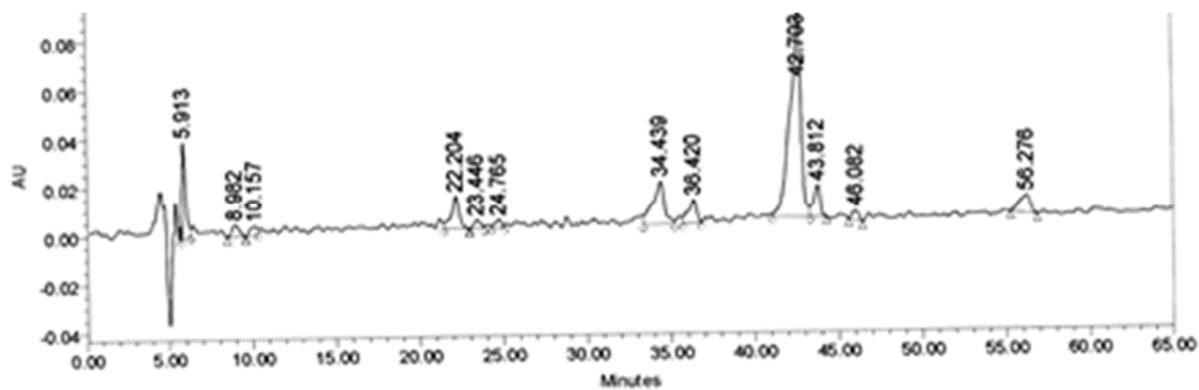

**Figure S1.** HPLC chromatogram of the mixture of mycosubtilin produced by *B. subtilis* ATCC 6633. Mycosubtilins were identified according to their retention time: mycosubtilin *iso*-C16 (34.439 min), mycosubtilin *n*-C16 (36.420 min), mycosubtilin *anteiso*-C17 (42.703 min) and mycosubtilin *iso*-C17 (43.812 min).

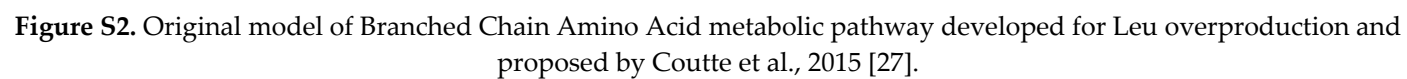



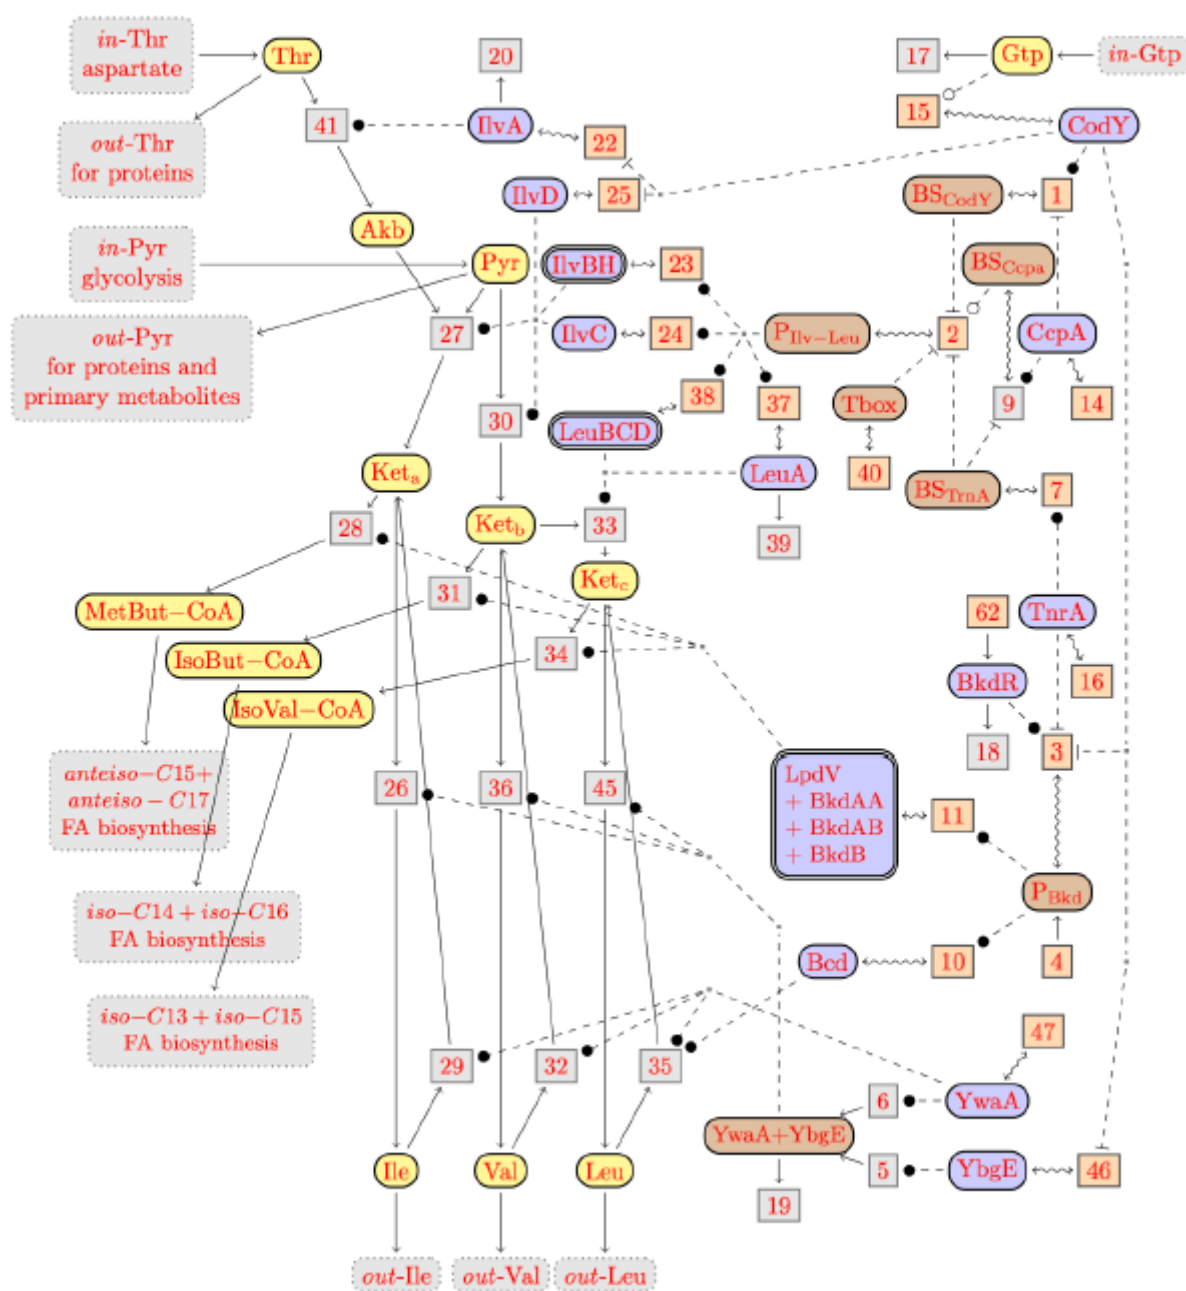

**Figure S4.** New reaction network of Branched Chain Amino Acid metabolic pathway developed for outflow of MetBut-CoA to the FA biosynthesis of *anteiso*-C15 and *anteiso*-C17 fatty acid chains. This picture can be compared with the Figure S3 to see evolution in the model.

**Excel file.** Supplementary data of raw microarray results
